# Supplementary material for: Using a Novel Microfabricated Model of the Alveolar-Capillary Barrier to Investigate the Effect of Matrix Structure on Atelectrauma
Source: PubMed Central journal article supplement (PMC5599538; doi:10.1038/s41598-017-12044-9), 2017-09-14

## Supplemental Information

**Manuscript Title:** *Using a Novel Microfabricated Model of the Alveolar-Capillary Barrier to*

*Investigate the Effect of Matrix Structure on Atelectrauma*

**Author List:**

*N. Higueta-Castro,<sup>1,2</sup> M.T. Nelson,<sup>1</sup> V. Shukla,<sup>1,2</sup> P.A. Agudelo-Garcia,<sup>3</sup> W. Zhang,<sup>4</sup> S.M. Duarte-Sanmiguel,<sup>1,5</sup> J.A. Englert<sup>4</sup> J.J. Lannutti,<sup>6</sup> D.J. Hansford,<sup>1</sup> and S.N. Ghadiali<sup>1,2,4\*</sup>*

<sup>1</sup>Biomedical Engineering Department, The Ohio State University, Columbus, Ohio

<sup>2</sup>Dorothy M. Davis Heart and Lung Research Institute, The Ohio State University Wexner Medical Center, Columbus, Ohio

<sup>3</sup>Department of Molecular and Cellular Biochemistry, The Ohio State University, Columbus, Ohio

<sup>4</sup>Department of Internal Medicine, Division of Pulmonary, Critical Care and Sleep Medicine, The Ohio State University Wexner Medical Center, Columbus, Ohio

<sup>5</sup>Human Nutrition Program, The Ohio State University, Columbus, Ohio

<sup>6</sup>Department of Material Sciences and Engineering, The Ohio State University, Columbus, Ohio

## A549\_ZO-1 Expression

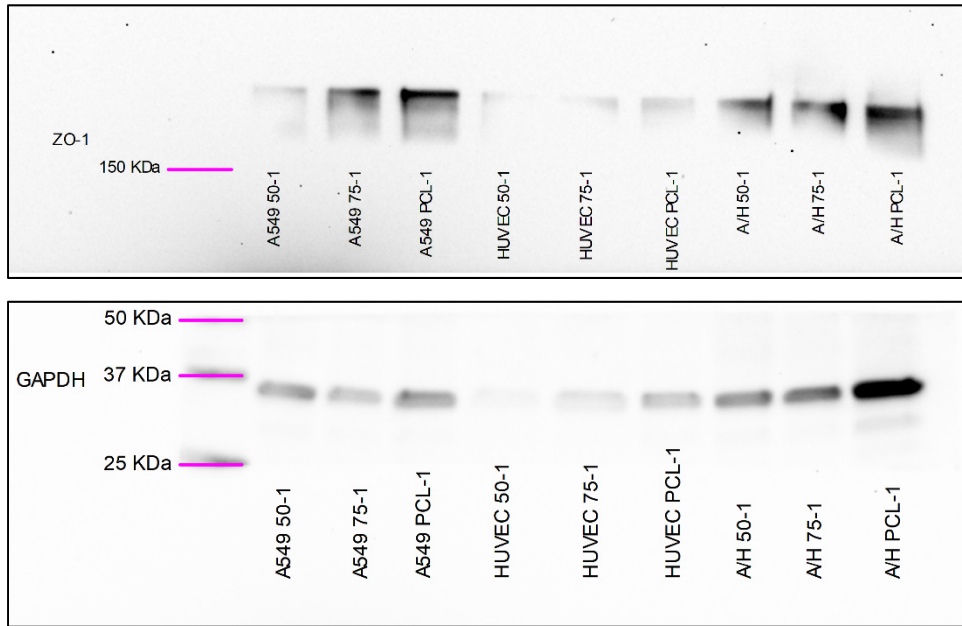

## A549\_OCLN Expression

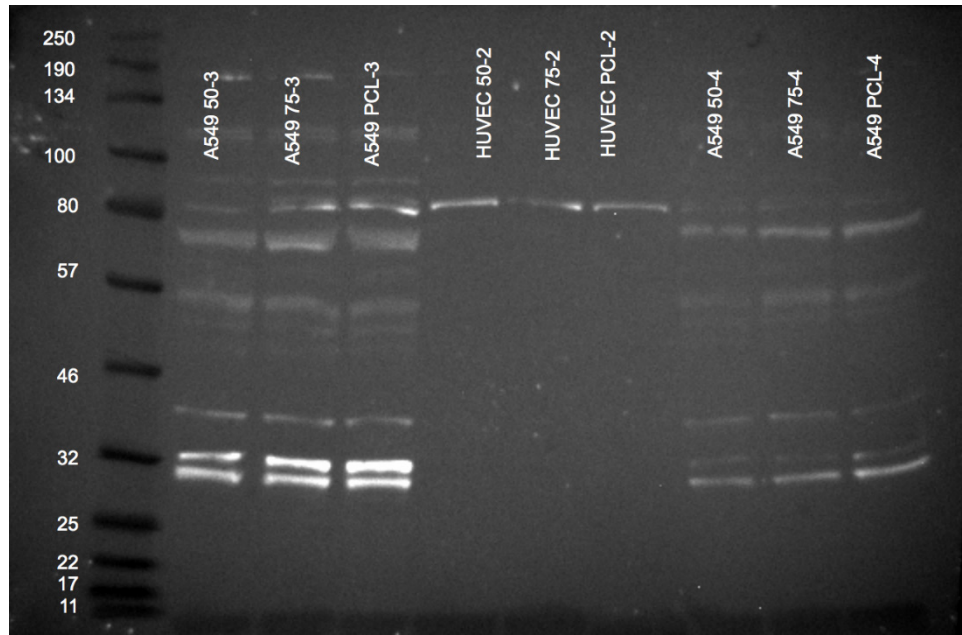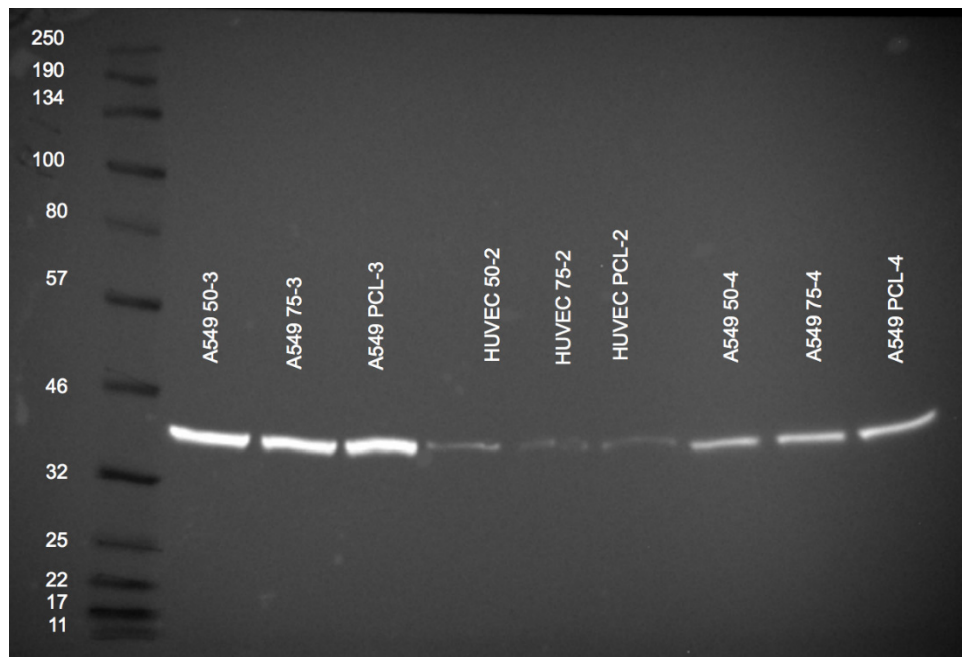

# HUVEC\_ZO-1 and OCLN Expression

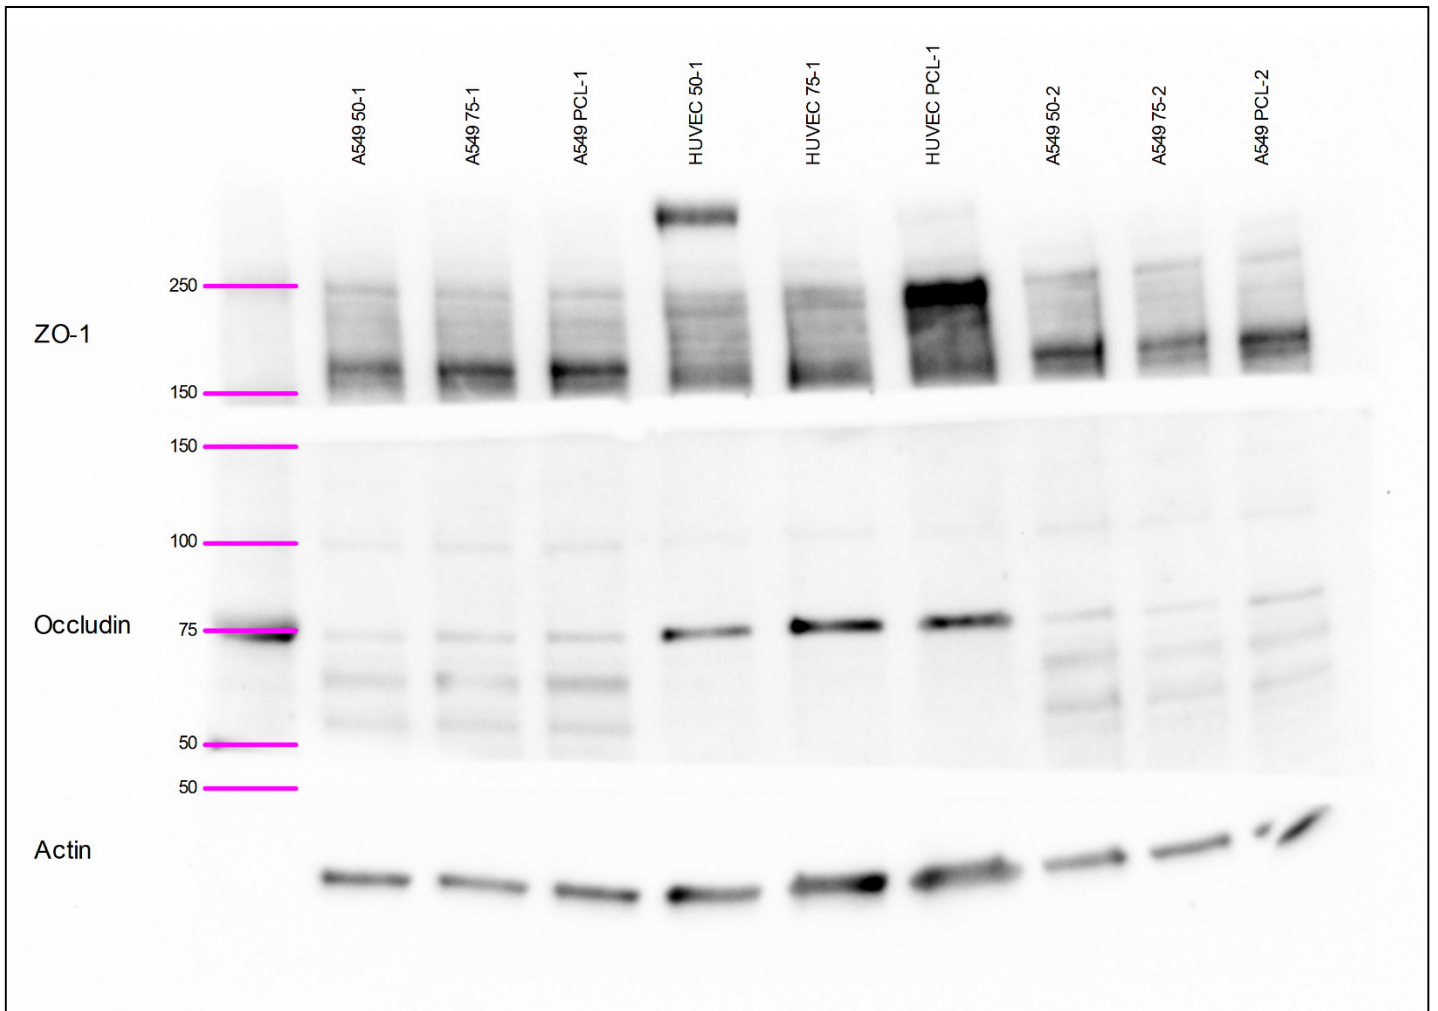

Supplement: 41598_2017_12044_MOESM1_ESM.pdf [file 41598_2017_12044_MOESM1_ESM.pdf]
